# Supplementary material for: The RNA helicase Dhh1p cooperates with Rbp1p to promote porin mRNA decay via its non-conserved C-terminal domain
Source: PubMed Central journal article supplement — Nucleic Acids Res. 2011 Oct 13;40(3):1331–44. doi: 10.1093/nar/gkr803 (PMC3273804; doi:10.1093/nar/gkr803), 2011-10-13
Supplement: supp_gkr803_nar-01544-d-2011-File008.pdf [file supp_gkr803_nar-01544-d-2011-File008.pdf]

## Supplementary Material:

### SUPPLEMENTAL FIGURE LEGENDS

#### **Figure S1. *DHH1* deletion partially suppressed the growth defect by overexpression of Rbp1p.**

We generated BY4741 wild-type, *dhh1Δ*, *pat1Δ*, or *lsm1Δ* strains whose expression of *RBPI* is under control of galactose-inducible promoter. (A) These yeast strains were grown in glucose to log phase, tenfold serial dilutions were plated onto YPD, YPGal, or YPGal plus 0.02% raffinose plates, and were grown at 30°C for 2~3 day. (B) The growth curves of these yeast strains in liquid culture were determined by measuring optical density at 600 nm. Yeasts were logarithmically grown in YPGal plus 0.02% raffinose medium with starting density  $OD_{600} = 0.05$ . The growth optical density (600 nm) was measured in aliquots from cultures at indicated time points. (C) Quantification of differential growth after 25 h incubation in panel B. The *bars* represent the means of three independent cultures.

#### **Figure S2. Rbp1p-dNMP lost its interaction with Dhh1p, but not Rbp1p-rrm1.**

(A) Rbp1p interacts with Dhh1p through its C-terminal NMP-rich region and (B) Rbp1p-rrm1 interacts with Dhh1p in yeast two-hybrid assays.  $\beta$ -galactosidase reporter assays were performed in YEM1 $\alpha$  cells expressing fusion protein LexA-lamin, -Rbp1p, -Rbp1p-dNMP, or -Rbp1p-rrm1 with Gal4AD-Dhh1p. Immunoblotting using anti-LexA and anti-HA show the expression level of indicated proteins.

#### **Figure S3. RecA-like domain II of Dhh1p or DDX6 is needed for the nonconserved C-terminal domain of Dhh1 to interact with Rbp1p.**

(A) Schematic representation of the C-terminal variants of Dhh1p, DDX6, and DDX6 chimera protein domain structures used in yeast two-hybrid. (B) Dhh1p-Ct or DDX6-Ct-C85 is sufficient for Rbp1p interaction. Yeast cotransformants and  $\beta$ -galactosidase reporter assays was performed as described in Materials and Methods. Immunoblotting using anti-LexA and anti-HA show the expression level of indicated proteins.

#### **Figure S4. Dhh1p or DDX6-C85 interacts with Rbp1p in RNA-independent manner.**

Immunoprecipitation was performed as described in Figure 6E and Materials and Methods, except the input lysate was pretreated with 100 mg/ml RNase A to digest RNA.

A

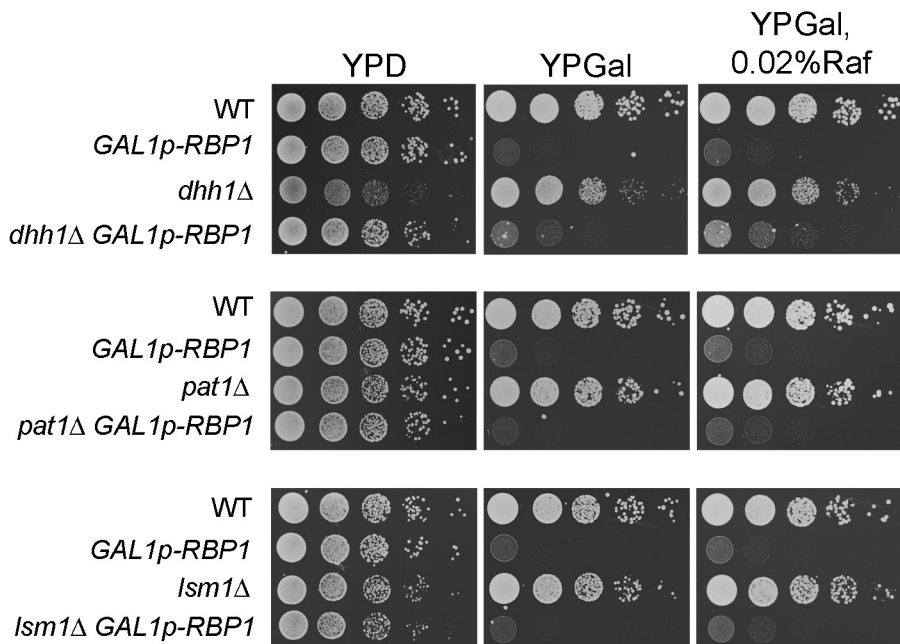

B

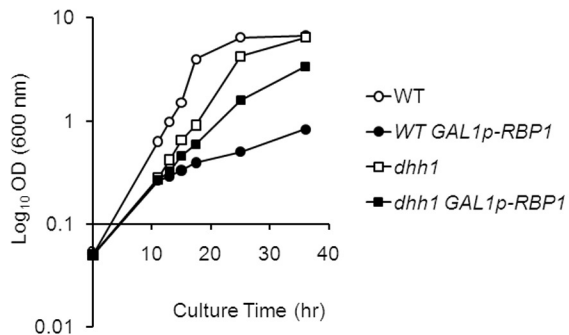

C

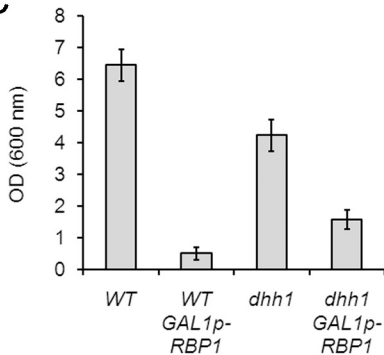

**A**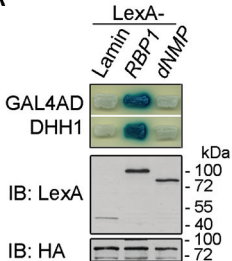**B**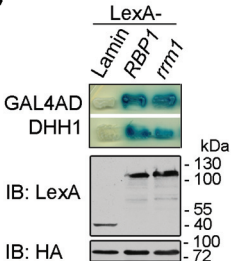

**A**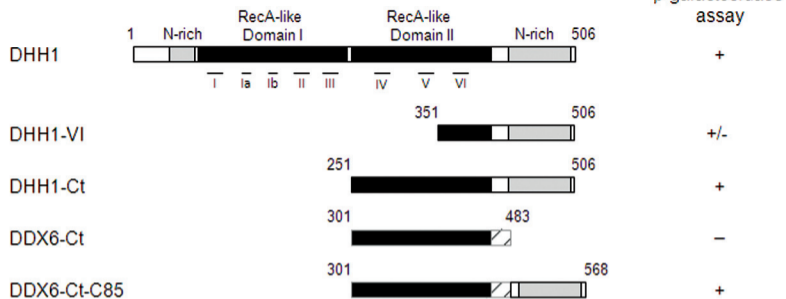**B**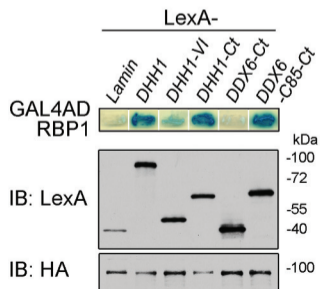

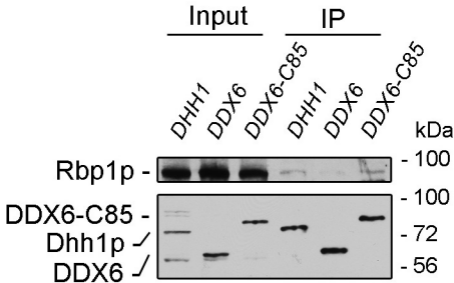

**Supplementary Table I.** Yeast strains used in this study

| Strain                                           | Genotype                                                                   | Source                  |
|--------------------------------------------------|----------------------------------------------------------------------------|-------------------------|
| YEM1 $\alpha$                                    | <i>MATa his3 trp1 leu2 6ops-LEU2 2ops-LacZ</i>                             |                         |
| BY4741                                           | <i>MATa his3 leu2 ura3 met15</i>                                           |                         |
| BY4741 <i>dhh1</i> $\Delta$                      | BY4741 except <i>dhh1::KanMX6</i>                                          | ResGen<br>(Invitrogen)  |
| BY4741 <i>pat1</i> $\Delta$                      | BY4741 except <i>pat1::KanMX6</i>                                          | ResGen<br>(Invitrogen)  |
| BY4741 <i>lsm1</i> $\Delta$                      | BY4741 except <i>lsm1::KanMX6</i>                                          | ResGen<br>(Invitrogen)  |
| BY4741 <i>xrn1</i> $\Delta$                      | BY4741 except <i>xrn1::KanMX6</i>                                          | ResGen<br>(Invitrogen)  |
| BY4741 <i>rbp1</i> $\Delta$                      | BY4741 except <i>rbp1::KanMX6</i>                                          | ResGen<br>(Invitrogen)  |
| BY4741 <i>rbp1</i> $\Delta$ <i>dhh1</i> $\Delta$ | BY4741 except <i>rbp1::KanMX6 dhh1::HisMX6</i>                             | This study              |
| BY4741 <i>DCP2-mCh</i><br><i>DHH1-GFP</i>        | BY4741 except <i>DCP2-mCherry::KanMX6</i><br><i>DHH1-GFP::HisMX6</i>       | This study              |
| BY4741 <i>DCP2-mCh</i><br><i>DHH1-dC81-GFP</i>   | BY4741 except <i>DCP2-mCherry::KanMX6</i><br><i>DHH1-dC81-GFP::HisMX6</i>  | This study              |
| BY4741 <i>DCP2-mCh</i><br><i>DHH1-dC106-GFP</i>  | BY4741 except <i>DCP2-mCherry::KanMX6</i><br><i>DHH1-dC106-GFP::HisMX6</i> | This study              |
| BY4741 <i>DHH1-3HA</i>                           | BY4741 except <i>DHH1-3HA::HisMX6</i>                                      | This study              |
| BY4741 <i>DHH1-dC81-3HA</i>                      | BY4741 except <i>DHH1-dC81-3HA::HisMX6</i>                                 | This study              |
| BY4741 <i>rbp1</i> $\Delta$ <i>DHH1-3HA</i>      | BY4741 except <i>rbp1::KanMX6</i><br><i>DHH1-3HA::KanMX6</i>               | This study              |
| BY4741 <i>RBPI-3HA</i>                           | BY4741 except <i>RBPI-3HA::HisMX6</i>                                      | This study              |
| BY4741 <i>dhh1</i> $\Delta$ <i>RBPI-3HA</i>      | BY4741 except <i>dhh1::KanMX6</i><br><i>RBPI-3HA::HisMX6</i>               | This study              |
| BY4741 <i>GAL1p-RBPI</i>                         | BY4741 except <i>GAL1p-RBPI::HisMX6</i>                                    | This study              |
| BY4741 <i>dhh1</i> $\Delta$ <i>GAL1p-RBPI</i>    | BY4741 except <i>dhh1::KanMX6</i><br><i>GAL1p-RBPI::HisMX6</i>             | This study              |
| BY4741 <i>pat1</i> $\Delta$ <i>GAL1p-RBPI</i>    | BY4741 except <i>pat1::KanMX6</i><br><i>GAL1p-RBPI::HisMX6</i>             | This study              |
| BY4741 <i>lsm1</i> $\Delta$ <i>GAL1p-RBPI</i>    | BY4741 except <i>lsm1::KanMX6</i><br><i>GAL1p-RBPI::HisMX6</i>             | This study              |
| YTC345                                           | <i>MATa rpb1-1ura3 leu2</i>                                                | Dr. Tien-Hsien<br>Chang |
| YTC345 <i>dhh1</i> $\Delta$                      | YTC345 except <i>dhh1::KanMX6</i>                                          | This study              |

**Supplementary Table II. Plasmids used in this study**

| Plasmid              | Features                                                           | Source     |
|----------------------|--------------------------------------------------------------------|------------|
| pVT101U              | <i>URA3</i> , 2 $\mu$ m, <i>ADH1p</i>                              | (1)        |
| pVT101U-HA-RBP1      | <i>URA3</i> , 2 $\mu$ m, <i>ADH1p-HA-RBP1</i>                      | (2)        |
| pVT101U-RBP1         | <i>URA3</i> , 2 $\mu$ m, <i>ADH1p-RBP1</i>                         | This study |
| pVT101U-RBP1-dNMP    | <i>URA3</i> , 2 $\mu$ m, <i>ADH1p-RBP1-dNMP</i>                    | This study |
| pVT101U-RBP1-rrm1    | <i>URA3</i> , 2 $\mu$ m, <i>ADH1p-RBP1-rrm1</i>                    | This study |
| pVT101U-DHH1         | <i>URA3</i> , 2 $\mu$ m, <i>ADH1p-DHH1</i>                         | This study |
| pVT101U-DHH1dC81     | <i>URA3</i> , 2 $\mu$ m, <i>ADH1p-DHH1-dC81</i>                    | This study |
| pVT101U-DHH1dC106    | <i>URA3</i> , 2 $\mu$ m, <i>ADH1p-DHH1-dC106</i>                   | This study |
| pVT101U-DDX6         | <i>URA3</i> , 2 $\mu$ m, <i>ADH1p-DDX6</i>                         | This study |
| pVT101U-DDX6-C85     | <i>URA3</i> , 2 $\mu$ m, <i>ADH1p-DDX6-C85<sup>Dhh1p</sup></i>     | This study |
| pVT101U-DHH1-2HA     | <i>URA3</i> , 2 $\mu$ m, <i>ADH1p-DHH1-2HA</i>                     | This study |
| pVT101U-DDX6-2HA     | <i>URA3</i> , 2 $\mu$ m, <i>ADH1p-DDX6-2HA</i>                     | This study |
| pVT101U-DDX6-C85-2HA | <i>URA3</i> , 2 $\mu$ m, <i>ADH1p-DDX6-C85<sup>Dhh1p</sup>-2HA</i> | This study |
| YEplac181            | <i>LEU2</i> , 2 $\mu$ m                                            | (3)        |
| YEplac181-HA-RBP1    | <i>LEU2</i> , 2 $\mu$ m, <i>ADH1p-HA-RBP1</i>                      | This study |
| YCplac111            | <i>LEU2</i> , <i>CEN4</i>                                          | (3)        |
| YCplac111-DHH1       | <i>LEU2</i> , <i>CEN4</i> , <i>ADH1p-DHH1</i>                      | This study |
| YCplac111-DHH1-dC81  | <i>LEU2</i> , <i>CEN4</i> , <i>ADH1p-DHH1-dC81</i>                 | This study |
| YCplac111-DHH1-dC106 | <i>LEU2</i> , <i>CEN4</i> , <i>ADH1p-DHH1-dC106</i>                | This study |
| pEG202               | <i>HIS3</i> , 2 $\mu$ m, <i>ADH1p</i>                              | (4)        |
| pEG202-DHH1          | <i>HIS3</i> , 2 $\mu$ m, <i>ADH1p-DHH1</i>                         | This study |
| pEG202-DHH1-dC81     | <i>HIS3</i> , 2 $\mu$ m, <i>ADH1p-DHH1-dC81</i>                    | This study |
| pEG202-DHH1-dC106    | <i>HIS3</i> , 2 $\mu$ m, <i>ADH1p-DHH1-dC106</i>                   | This study |
| pEG202-DHH1-VI       | <i>HIS3</i> , 2 $\mu$ m, <i>ADH1p-DHH1-VI</i>                      | This study |
| pEG202-DHH1-Ct       | <i>HIS3</i> , 2 $\mu$ m, <i>ADH1p-DHH1-Ct</i>                      | This study |
| pEG202-DDX6          | <i>HIS3</i> , 2 $\mu$ m, <i>ADH1p-DDX6</i>                         | This study |
| pEG202-DDX6-Ct       | <i>HIS3</i> , 2 $\mu$ m, <i>ADH1p-DDX6-Ct</i>                      | This study |
| pEG202-DDX6-C85      | <i>HIS3</i> , 2 $\mu$ m, <i>ADH1p-DDX6-C85<sup>Dhh1p</sup></i>     | This study |
| pEG202-DDX6-C85-Ct   | <i>HIS3</i> , 2 $\mu$ m, <i>ADH1p-DDX6-C85<sup>Dhh1p</sup>-Ct</i>  | This study |
| pEG202-RBP1          | <i>HIS3</i> , 2 $\mu$ m, <i>ADH1p-RBP1</i>                         | This study |
| pEG202-RBP1-dNMP     | <i>HIS3</i> , 2 $\mu$ m, <i>ADH1p-RBP1-dNMP</i>                    | This study |
| pEG202-RBP1-rrm1     | <i>HIS3</i> , 2 $\mu$ m, <i>ADH1p-RBP1-rrm1</i>                    | This study |
| pJG4-5               | <i>TRP1</i> , 2 $\mu$ m, <i>GAL1p</i>                              | (4)        |
| pJG4-5-RBP1          | <i>TRP1</i> , 2 $\mu$ m, <i>GAL1p-RBP1</i>                         | Our Lab    |
| pJG4-5-DHH1          | <i>TRP1</i> , 2 $\mu$ m, <i>GAL1p-DHH1</i>                         | Our Lab    |

1. Vernet, T., Dignard, D. and Thomas, D.Y. (1987) A family of yeast expression vectors containing the phage f1 intergenic region. *Gene*, **52**, 225-233.
2. Buu, L.M., Jang, L.T. and Lee, F.J. (2004) The yeast RNA-binding protein Rbp1p modifies the stability of mitochondrial porin mRNA. *J Biol Chem*, **279**, 453-462.
3. Gietz, R.D. and Prakash, S. (1988) Cloning and nucleotide sequence analysis of the *Saccharomyces cerevisiae* RAD4 gene required for excision repair of UV-damaged DNA. *Gene*, **74**, 535-541.
4. Gyuris, J., Golemis, E., Chertkov, H. and Brent, R. (1993) Cdi1, a human G1 and S phase protein phosphatase that associates with Cdk2. *Cell*, **75**, 791-803.
